# Supplementary material for: Translation of circHGF RNA encodes an HGF protein variant promoting glioblastoma growth through stimulation of c-MET
Source: PubMed Central journal article supplement (PMC10232650; doi:10.1007/s11060-023-04331-5), 2023-05-10
Supplement: 11060_2023_4331_MOESM2_ESM.pdf [file 11060_2023_4331_MOESM2_ESM.pdf]

| gene               | circBase RNA ID         | RPF count |     |
|--------------------|-------------------------|-----------|-----|
|                    |                         | NB        | GBM |
| <i>circ-HGF</i>    | <i>hsa_circ_0080914</i> | 0         | 11  |
| <i>circ-E-Cad</i>  | <i>hsa_circ_0039992</i> | 0         | 8   |
| <i>circ-Rictor</i> | <i>hsa_circ_0129052</i> | 3         | 5   |
| <i>circ-PINK1</i>  | <i>hsa_circ_0111789</i> | 1         | 7   |
| <i>circ-TAZ</i>    | <i>hsa_circ_0139927</i> | 3         | 9   |
| <i>circ-Rictor</i> | <i>hsa_circ_0129052</i> | 3         | 7   |
| <i>circ-PTPRZ1</i> | <i>hsa_circ_0133169</i> | 6         | 11  |
| <i>circ-RALY</i>   | <i>hsa_circ_0114956</i> | 12        | 4   |
| <i>circ-KIT</i>    | <i>hsa_circ_0126617</i> | 5         | 6   |
| <i>circ-CNST</i>   | <i>hsa_circ_0112857</i> | 13        | 2   |
| <i>circ-PAX6</i>   | <i>hsa_circ_0095689</i> | 3         | 9   |
| <i>circ-GLI3</i>   | <i>hsa_circ_0134316</i> | 4         | 7   |

**Supplementary Figure S1.** Twelve differentially expressed coding circRNAs which were annotated in circBase and numbers of ribosome protected fragments (RFPs) detected in GBM and normal brain (NB).
