# Supplementary material for: Translation of circHGF RNA encodes an HGF protein variant promoting glioblastoma growth through stimulation of c-MET
Source: PubMed Central journal article supplement (PMC10232650; doi:10.1007/s11060-023-04331-5), 2023-05-10
Supplement: 11060_2023_4331_MOESM4_ESM.pdf [file 11060_2023_4331_MOESM4_ESM.pdf]

**a**

**>hsa\_circ\_0080914**

```

UUGAAUGCAUGGCCUGCAAUGGGGAGAGUUAUCGAGGUCUCAUGGA
UCAUACAGAAUCAGGCAAGAUUUUGUCAGCGCUGGGAUCAUCAGACA
CCACACCGGCACAAAUUCUUGCCUGAAAGAUUCCCGACAAGGGCU
UUGAUGAUUAUGAAUUGCCGAAUCCCGAUGGCCAGCCGAGGCAUG
GUGCUAUACUCUUGACCCUCACACCCGCUGGGAGUACUGGCAUU
AAAACAUUGCUCUGACAUAUACUAUGAAUGACACUGAUGUUAAUUGGA
AACAAUGAAUGCAUCCAAGGUCAGGAGAAGGCUACAGGGGCACU
GUCAAUACCAUUGGAAUGGAAUCCAUGUCAGCGUUGGGAAUUCUC
AGUAUCCUCACGAGCAUGACAUGACUCCUGAAUUUCAAGUGCAAG
GACCUACGAGAAAAUUACUGAAGAAUCCAGAUGGGUCUGAAUCACC
CUGGUGUUUACCACUGAUCCAACAUCCGAGUUGGCUACUGCUC
AAAUCCAACUGUGAUUAUGUCACAUGGACAAGAUUGUUUUCGUGG
GAAUGGCAAAAAUUUAUUGGGCAACUUAUCCCAAACAGAUUCGGAC
UGGCAUGUUCAAUGUGGACAAGAACAUGGAAGACUUAUCAUCGUCA
UAUCUUCUGGGAACCAUGCAAGUAAGCUGAAUGAGAAUUACUGC
CGAAUCCAGAUAGAUGCUCAUGGACCCUGGUCUACACGGGAA
AUCCACUCAUCCUUGGGAUUUUGCCUUAUUUCUGUU

```

**b**

**C-HGF 119 aa**

```

MGNLSQTRSGLACSMWDKNMEDLHRHIFWEPDASKLNENYCRNPDDD
AHGPWCYTG NPLIPWDYCPISRF LNAWPAMGRVIEVSWIIQNQARFVSA
GIIRHHTGTNSCLKDIPTRALMI

```

Specific aa for C-HGF

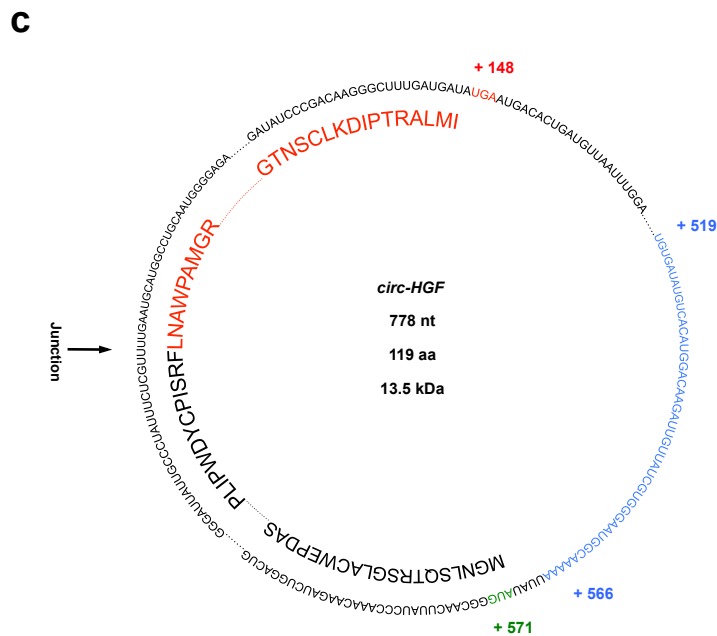

**Supplementary Figure S5. a** Nucleotide sequence of *circ-HGF* (*hsa\_circ\_0080914*) RNA. **b** The amino acid sequence of C-HGF. Shown in red are the 49 C-HGF specific aa. **c** *circ-HGF* sequence showing the positions of the back-splicing junction, IRES (blue), start codon (green) and stop codon (red).
