# Supplementary material for: Translation of circHGF RNA encodes an HGF protein variant promoting glioblastoma growth through stimulation of c-MET
Source: PubMed Central journal article supplement (PMC10232650; doi:10.1007/s11060-023-04331-5), 2023-05-10
Supplement: 11060_2023_4331_MOESM6_ESM.pdf [file 11060_2023_4331_MOESM6_ESM.pdf]

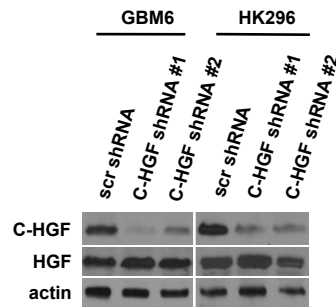

**Supplementary Figure S4.** C-HGF and endogenous HGF protein levels in GBM6 and HK296 cells expressing the control nontargeting scramble (*scr*) sequence or C-HGF targeting shRNAs as indicated.
