# Supplementary material for: Translation of circHGF RNA encodes an HGF protein variant promoting glioblastoma growth through stimulation of c-MET
Source: PubMed Central journal article supplement (PMC10232650; doi:10.1007/s11060-023-04331-5), 2023-05-10
Supplement: 11060_2023_4331_MOESM7_ESM.pdf [file 11060_2023_4331_MOESM7_ESM.pdf]

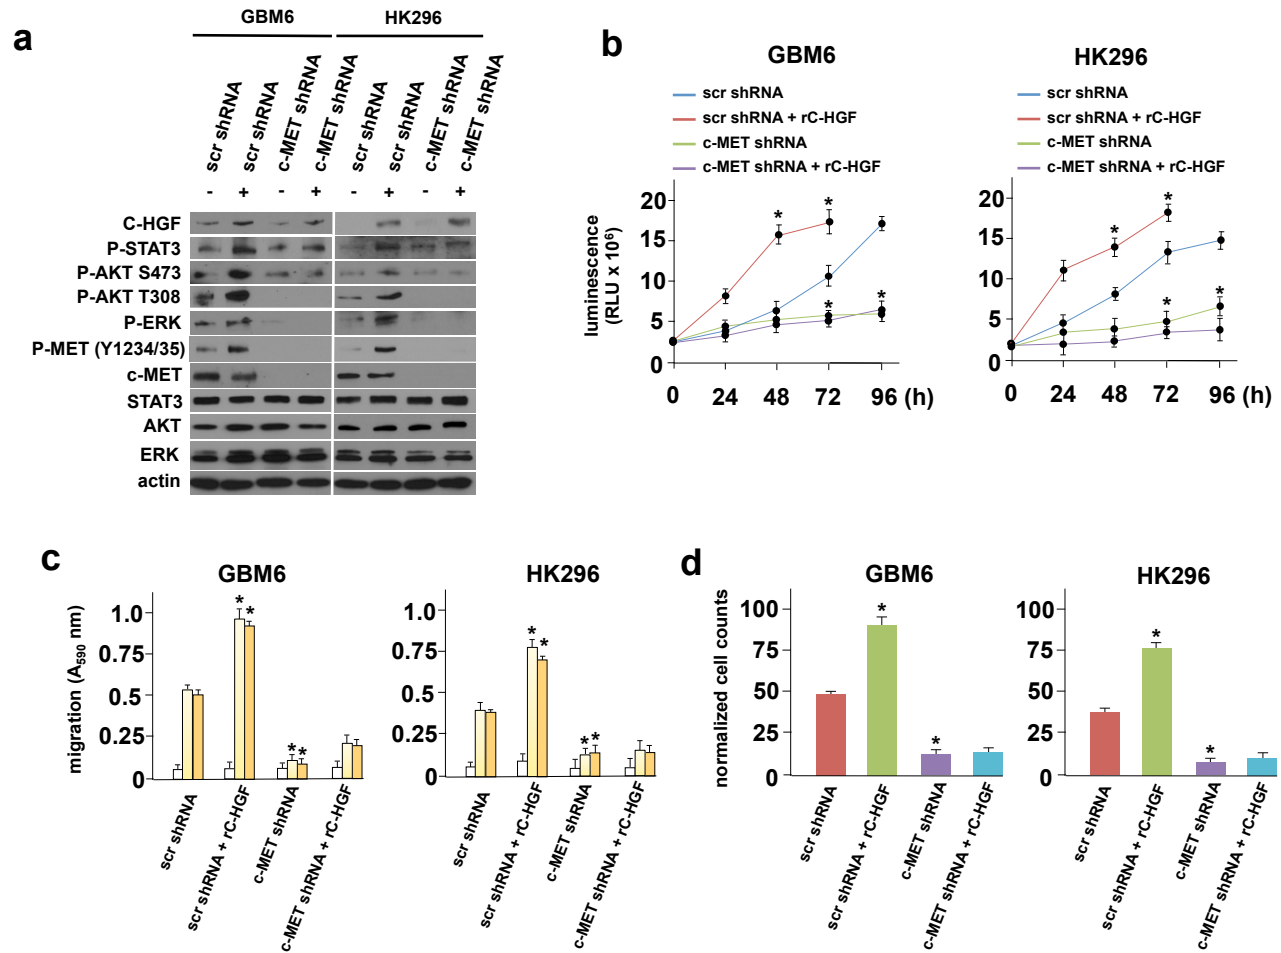

**Supplementary Figure S5.** Effects of c-MET knockdown on rC-HGF induced cell signaling, proliferation, migration and invasive capacity in GBM6 and HK296 cells. **a** GBM6 or HK296 cells stably expressing either a control nontargeting scramble (scr) sequence or c-MET targeting shRNA were treated (- / +) with rC-HGF (200 ng/ml, 8 h) as shown and immunoblotted for the indicated proteins. **b** Scr shRNA or c-MET shRNA expressing GBM6 or HK296 cells were treated with or without (200 ng/ml) of rC-HGF and proliferation determined via ATP-release assays at the timepoints indicated. Mean  $\pm$  S.D., \*,  $p < 0.05$ ,  $n = 3$ . **c** Scr shRNA or c-MET shRNA expressing GBM6 or HK296 cells were placed in Boyden chambers in the absence or presence of rC-HGF (200 ng/ml) and allowed to migrate towards BSA (white bars), vitronectin (light yellow bars) or fibronectin (dark yellow bars). Mean  $\pm$  S.D., \*,  $p < 0.05$ ,  $n = 3$ . **d** Invasive potential of scr shRNA or c-MET shRNA expressing GBM6 or HK296 cells in the absence or presence of rC-HGF (200 ng/ml) migrating through Matrigel. Mean  $\pm$  S.D., \*,  $p < 0.05$ ,  $n = 3$ .
